# Supplementary material for: Polar-localized NPH3-like proteins regulate polarity and endocytosis of PIN-FORMED auxin efflux carriers
Source: Oxford University Press journal article supplement (doi:10.1242/dev.057745), 2011-04-14
Supplement: dev057745tables1.pdf [file dev057745tables1.pdf]

**Table S1. A list of primer sets for RT-PCR analysis**

| Gene        | Primer set                                                |
|-------------|-----------------------------------------------------------|
| <i>MEL1</i> | 5'-cggaatggctcgcgactt-3' and 5'-tgatatcttctgtgtcca-3'     |
| <i>MEL2</i> | 5'-cttgatcacaactgattc-3' and 5'-catctcgatactcagcag-3'     |
| <i>MEL3</i> | 5'-ctgaggatctcaactgtt-3' and 5'-tgattgtcttatgcttcacc-3'   |
| <i>MEL4</i> | 5'-gattgtcatagatctctc-3' and 5'-cagtagaagcaatagagccg-3'   |
| <i>PIN1</i> | 5'-gcttcattactgttcgtcg-3' and 5'-gatctctccgtttccgtct-3'   |
| <i>PIN2</i> | 5'-gctacacgtggtggtcgaag-3' and 5'-gactccactgctccactcg-3'  |
| <i>PIN3</i> | 5'-ccaacgcttcacgtcgttcg-3' and 5'-ggtagccgtttgagctcca-3'  |
| <i>PIN4</i> | 5'-gcttcattgtaccgtgagga-3' and 5'-gaccggagaagcgcttgagc-3' |
| <i>PIN7</i> | 5'-tcaaacgcttctcggagatc-3' and 5'-acttgaagaccagctcggtc-3' |
| <i>ACT8</i> | 5'-atgaagattaaggtcgtggca-3' and 5'-tccgagttgaagaggctac-3' |
